# Supplementary material
Source: PubMed Central journal article supplement (PMC4966326)
Supplement: JCI82529.sd.pdf [file JCI82529.sd.pdf]

## Supplemental figures:

### **Figures S1: Immunofluorescent analysis of WT and *Gli1*<sup>-/-</sup> for SPEM.**

Representative images of immunofluorescent staining for mucous neck cells with GSII lectin (green), GIF (red) and H<sup>+</sup>,K<sup>+</sup>-ATPase (white) antibodies in each group as indicated: WT uninfected mice (UI); WT plus *H. felis* (*Hf*) infection for 6 months (WT+*Hf*); *Gli1*<sup>-/-</sup> plus *H. felis* infection for 6 months (*Gli1*<sup>-/-</sup> +*Hf*). Mice receiving the BMT received cells from SLFN4-tdT<sup>+</sup> donor mice prior to infecting with *H. felis* (w/BMT). N=5 mice analyzed per group. Scale bar=50μm.

### **Figure S2: Analysis of major immune cell types in WT versus *pCMV-Shh* mice.**

Corpus cells from WT versus *pCMV-Shh* mice were analyzed for immune cell markers in uninfected mice: F4/80 (macrophages); CD11b (myeloid cell lineage); CD11c (dendritic cells); Ly6B.2 (neutrophils); CD3 (T cells). The percentage of labeled cells enumerated is shown in the representative dot plot graphs. The scatter graph shows the median and interquartile range for N=3 separate mice per group. Multiple T tests were performed to compare the differences between WT vs *pCMV-Shh* genotypes for each immune marker. \*P<0.05.

### **Figure S3: Q-PCR analysis of SPEM markers. *Atp4α*, *Gif*, *Tff2* and clusterin (*Clu*)**

mRNA from WT and *pCMV-Shh* mouse corpi with and without 4 months of infection with *H. felis*. Shown is the median fold change relative to WT values and interquartile range for N=8-10 mice for 3 separate expts. One-way ANOVA followed by Tukey's multiple comparisons test on-log transformed values was performed. \*P<0.05; \*\*\*P<0.001; \*\*\*\*P<0.0001; NS, not significant.

**Figure S4: *H. felis*-infected *pCMV-Shh* corpus versus antrum.** Representative images of 4-month infected **A)** Corpus; **B)** Antrum. N>10 mice analyzed. Scale bar =50μm.

**Figure S5: Flow cytometric analysis of SLFN4-tdTomato<sup>+</sup> cells.** **A)** The percentage of SLFN4<sup>+</sup> cells in BM, spleen and corpus over time from uninfected mice. N=3 separate mice per group. \*P<0.05. SLFN4-tdT<sup>+</sup> cells vs SSC flow cytometry dot plot graphs for infected WT versus *pCMV-Shh* at indicated time points from **B)** BM, spleen and corpus (Summary graphs for these 3 tissues shown in Fig. 3) and **C)** liver and small intestine. The percentage of SLFN4<sup>+</sup> cells is shown in the representative dot plot graphs. N=8-10 mice per group over 3 expts; **D)** Summary of **C)** as percent of SLFN4-tdT<sup>+</sup> cells. Shown is the median and interquartile range. Kruskal-Wallis ANOVA with Dunn's test of multiple comparisons was performed for **A** and **D**.

**Figure S6: SHH responsive CD11b<sup>+</sup> cells at 4 and 6 months after *H. felis* infection.** Corpus cells were isolated from WT and *pCMV-Shh* mice 4- and 6-month after *H. felis* infection. Gated CD11b<sup>+</sup> cells were analyzed for SLFN4-tdT fluorescence and the GR-1<sup>+</sup> surface marker. The percentage of gated cells is shown as median (interquartile range), N=5 mice per group over 2 independent experiments.

**Figure S7: Identification of IFN $\alpha$ -expressing cells from infected corpus.** Corpus cells isolated from 4-month infected *pCMV-Shh* mice were stained for IFN $\alpha$ , E-cadherin, PDCA-1 (which detects plasmacytoid dendritic cells, pDCs) and CD8a. Gated IFN $\alpha$ <sup>+</sup> cells (R1) were analyzed for E-cadherin and PDCA-1. PDCA-1<sup>-</sup>/E-cadherin<sup>-</sup> double negative cells (R2) were gated for analysis of CD8a expression. The percentage of gated cells is shown as median (interquartile range) for N=3 separate mice.

**Figure S8. IFN $\alpha$  induces *Slfn4* gene expression in primary myeloid cells.** **A)** WT or *Gli1*<sup>+/-</sup> peritoneal myeloid cells analyzed by flow cytometry for CD11b (versus forward scatter, FSC). Gated CD11b<sup>+</sup> cells were treated with rIFN $\alpha$  and then analyzed for GR-1 and SLFN4 expression by flow cytometry. The percentage of gated cells is shown in the graph. **B)** Schematic experimental protocol. **C)** *Slfn4* mRNA analysis of CD11b<sup>+</sup>/GR-1<sup>+</sup> versus CD11b<sup>+</sup>/GR-1<sup>-</sup> cells. Shown for **A)** and **C)** are the median (interquartile range) for N= 3 experiments performed in triplicate. One-way ANOVA followed by Tukey's multiple comparisons test on log-transformed values was performed. \* P<0.05.

**Figure S9. Primary myeloid cells exhibit T cell suppressor function after IFN $\alpha$  treatment.** Primary myeloid cells from the WT and *Gli1*<sup>+/-</sup> mice were treated with rIFN $\alpha$  and then flow sorted for SLFN4-tdT<sup>+</sup> and SLFN4-tdT<sup>-</sup> cells. These two subpopulations were analyzed for **A)** *iNos* mRNA or **B)** *Arg1* mRNA. One-way ANOVA followed by Tukey's multiple comparisons test on log-transformed values was performed. \*P<0.05. NS, not significant. **C)** The CFSE T suppression assay was performed using sorted cells by co-culturing with activated splenic T cells in a ratio of 1:10. The percentage of proliferating T cells is shown. For **A-C)**, shown are the median and interquartile range for N= 3 experiments performed in triplicate. \*P<0.05. NS, not significant.

**Figure S10. Bone marrow transplantation efficiency.** DNA (1ng) from the bone marrow of WT and *pCMV-Shh* chimeric mice with bone marrow transplanted from *Slfn4-tdT* mice were used for qPCR analysis of tdTomato(tdT) DNA. Amount of *Slfn4-tdT*<sup>+</sup> donor mice DNA was set to 1. Ratio of tdT DNA from chimeric mice 6 weeks post-BMT versus donor mice is shown. Each symbol represents one mouse. (-) indicates the mean. N= 10 mice per group. Samples with a ratio <0.5 were excluded from further analysis.

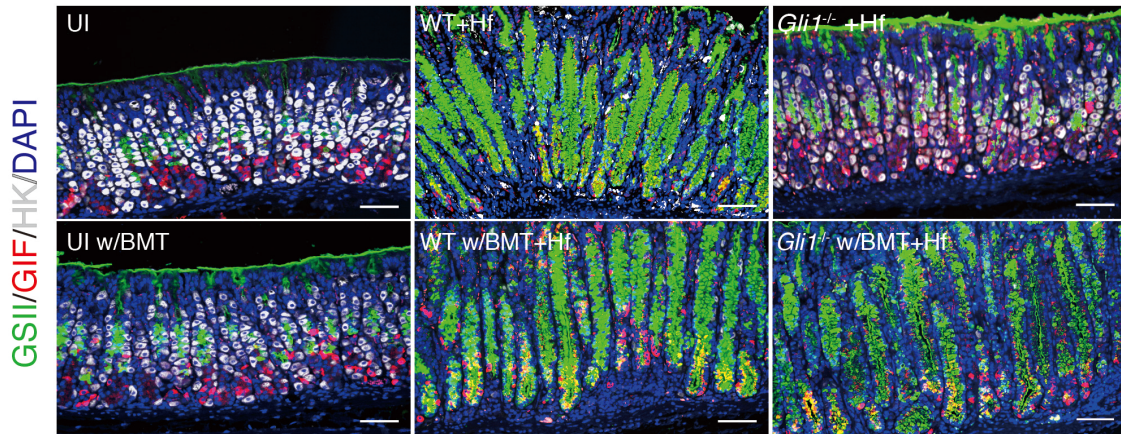

**Figures S1: Immunofluorescent analysis of WT and *Gli1*<sup>-/-</sup> for SPEM.** Representative images of immunofluorescent staining for mucous neck cells with GSII lectin (green), GIF (red) and H<sup>+</sup>,K<sup>+</sup>-ATPase (white) antibodies in each group as indicated: WT uninfected mice (UI); WT plus *H. felis* (Hf) infection for 6 months (WT+ Hf); *Gli1*<sup>-/-</sup> plus *H. felis* infection for 6 months (*Gli1*<sup>-/-</sup> + Hf); Mice receiving the BMT received cells from SLFN4-tdT<sup>+</sup> donor mice prior to infecting with *H. felis* (w/BMT). N=5 mice analyzed per group. Scale bar=50 μm.

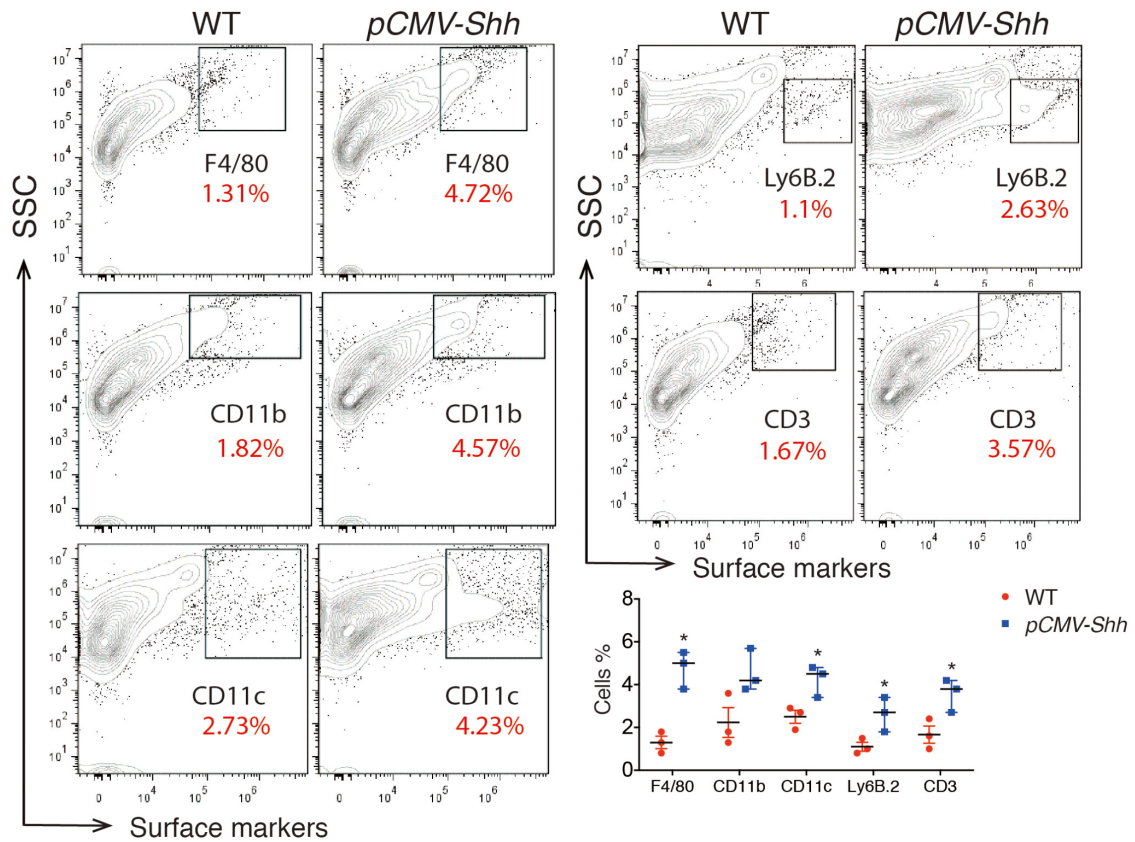

**Figure S2: Analysis of major immune cell types in WT versus *pCMV-Shh* mice.** Corpus cells from WT versus *pCMV-Shh* mice were analyzed for immune cell markers in uninfected mice: F4/80 (macrophages); CD11b (myeloid cell lineage); CD11c (dendritic cells); Ly6B.2 (neutrophils); CD3 (T cells). The percentage of labeled cells enumerated is shown in the representative dot plot graphs. The scatter graph shows the median and interquartile range for N=3 separate mice per group. Multiple T tests were performed to compare the differences between WT vs *pCMV-Shh* genotypes for each immune marker. \*P<0.05.



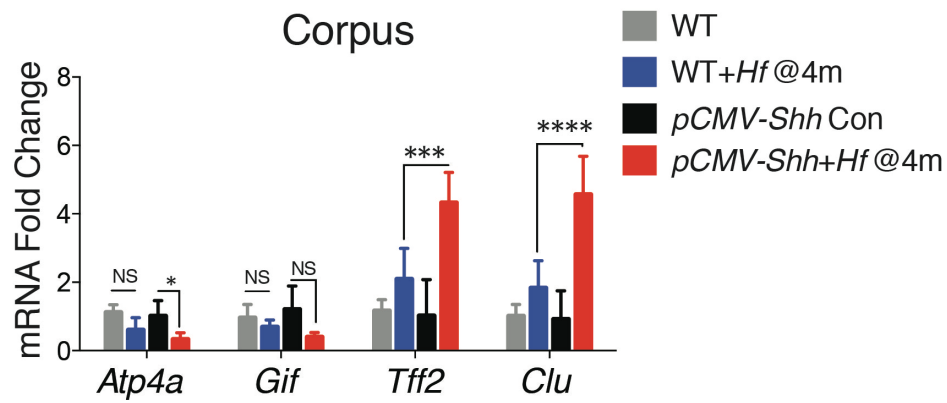

**Figure S3: Q-PCR analysis of SPEM markers.** *Atp4a*, *Gif*, *Tff2* and clusterin (*Clu*) mRNA from WT and *pCMV-Shh* mouse corpi with and without 4 months of infection with *H. felis*. Shown is the median fold change relative to WT values and interquartile range for N=8-10 mice for 3 separate expts. One-way ANOVA followed by Tukey's multiple comparisons test on-log transformed values was performed. \*P<0.05; \*\*\*P<0.001; \*\*\*\*P<0.0001; NS, not significant.

*pCMV-Shh + H. felis* at 4 Month

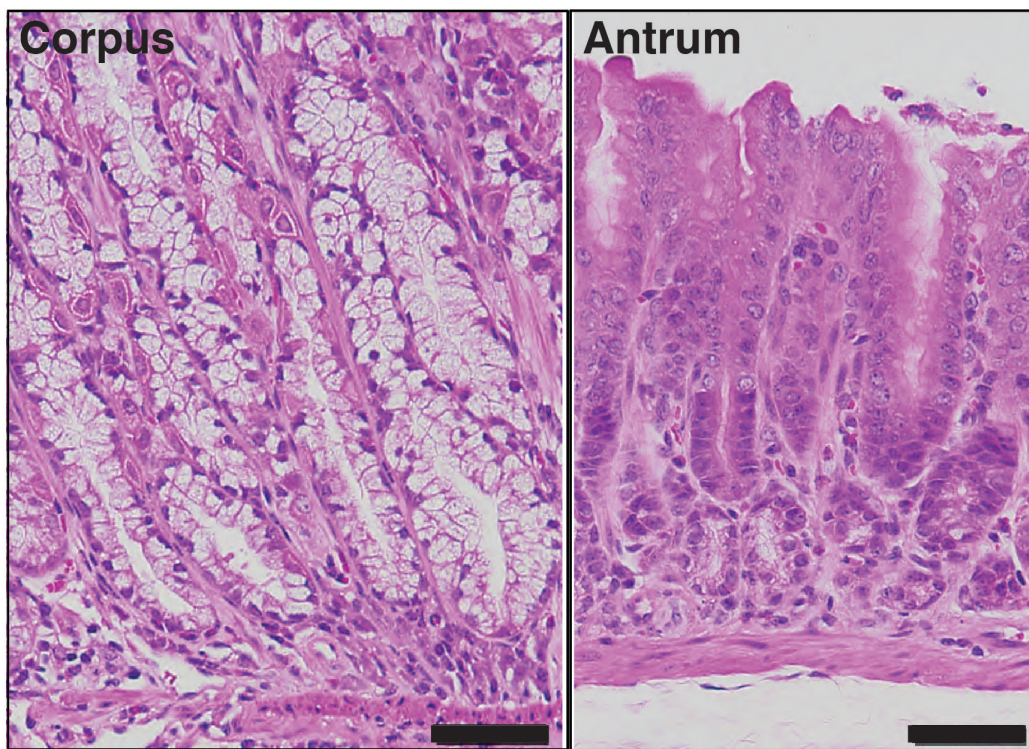

**Figure S4:** *H. felis* infected *pCMV-Shh4* corpus versus antrum. Representative images of **A)** Corpus; **B)** Antrum. N>10 mice analyzed. Scale bar =50 $\mu$ m.

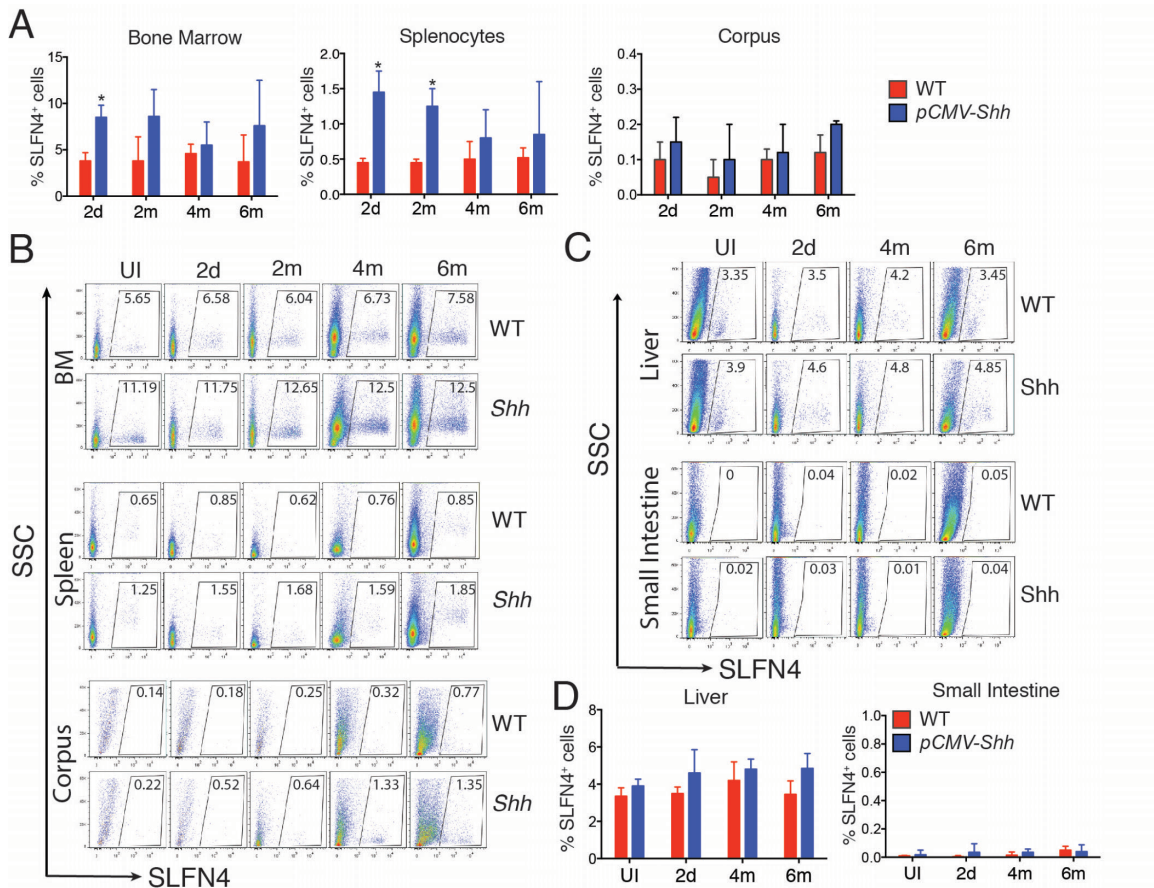

**Figure S5: Flow cytometric analysis of *SLFN4-tdT<sup>+</sup>* cells.** **A)** The percentage of *SLFN4<sup>+</sup>* cells in BM, spleen and corpus over time from uninfected mice.  $N=3$  separate mice per group.  $*P<0.05$ . *SLFN4-tdT<sup>+</sup>* cells vs SSC flow cytometry dot plot graphs for infected WT versus *pCMV-Shh* at indicated time points from **B)** BM, spleen and corpus (Summary graphs for these 3 tissues shown in Fig. 3) and **C)** liver and small intestine. The percentage of *SLFN4<sup>+</sup>* cells is shown in the representative dot plot graphs.  $N=8-10$  mice per group over 3 expts; **D)** Summary of **C)** as percentage of *Sifn4-tdT<sup>+</sup>* cells. Shown is the median and interquartile range. Kruskal-Wallis ANOVA with Dunn's test of multiple comparisons was performed for **A)** and **D)**.

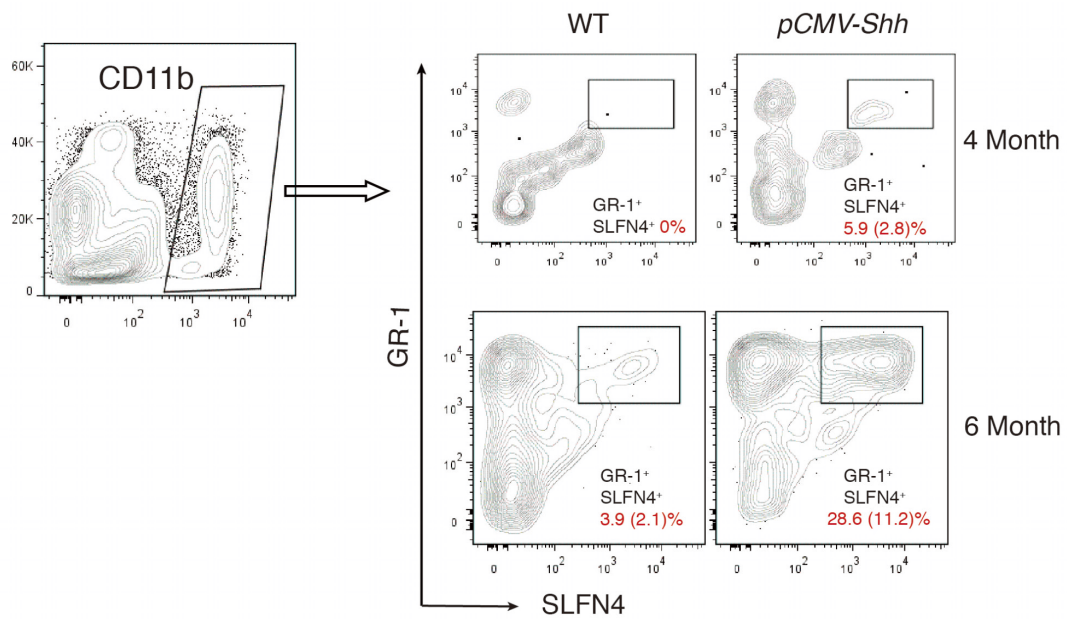

**Figure S6: SHH responsive CD11b<sup>+</sup> cells at 4 and 6 months after *H. felis* infection.** Corpus cells were isolated from WT and *pCMV-Shh* mice 4- and 6-month after *H. felis* infection. Gated CD11b<sup>+</sup> cells were analyzed for SLFN4-tdT fluorescence and the GR-1<sup>+</sup> surface marker. The percentage of gated cells is shown as median (interquartile range), N=5 mice per group over 2 independent experiments.

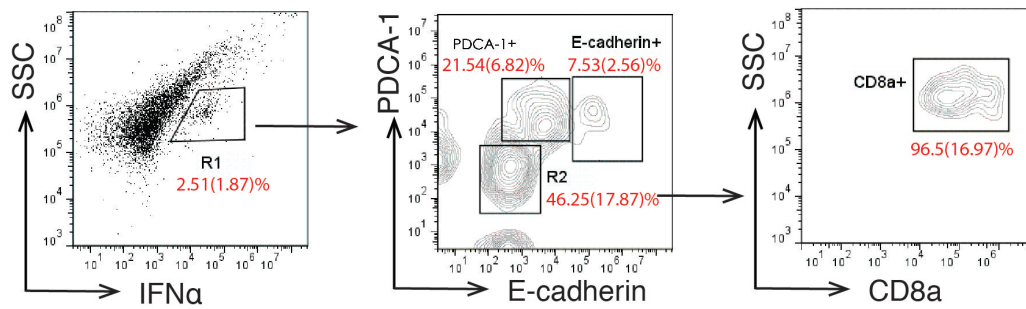

**Figure S7: Identification of IFN $\alpha$ -expressing cells from infected corpus.** Corpus cells isolated from 4-month infected *pCMV-Shh* mice were stained for IFN $\alpha$ , E-cadherin, PDCA-1 (which detects plasmacytoid dendritic cells, pDCs) and CD8a. Gated IFN $\alpha$ <sup>+</sup> cells (R1) were analyzed for E-cadherin and PDCA-1. PDCA-1<sup>-</sup>/E-cadherin<sup>-</sup> double negative cells (R2) were gated for analysis of CD8a expression. The percentage of gated cells is shown as median (interquartile range) for N=3 separate mice.



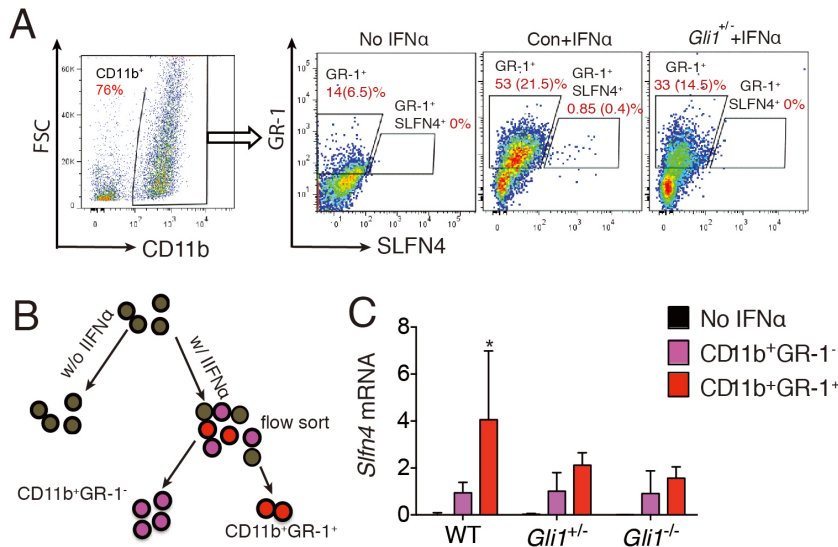

**Figure S8. IFN $\alpha$  induces *Slfn4* gene expression in primary myeloid cells. A)** WT or *Gli1*<sup>+/-</sup> peritoneal myeloid cells analyzed by flow cytometry for CD11b (versus forward scatter, FSC). Gated CD11b<sup>+</sup> cells were treated with rIFN $\alpha$  and then analyzed for GR-1 and SLFN4 expression by flow cytometry. The percentage of gated cells is shown in the graph. **B)** Schematic experimental protocol. **C)** *Slfn4* mRNA analysis of CD11b<sup>+</sup>/GR-1<sup>+</sup> versus CD11b<sup>+</sup>/GR-1<sup>-</sup> cells. Shown for **A)** and **C)** are the median (interquartile range) for N= 3 experiments performed in triplicate. One-way ANOVA followed by Tukey's multiple comparisons test on log-transformed values was performed. \* P<0.05.



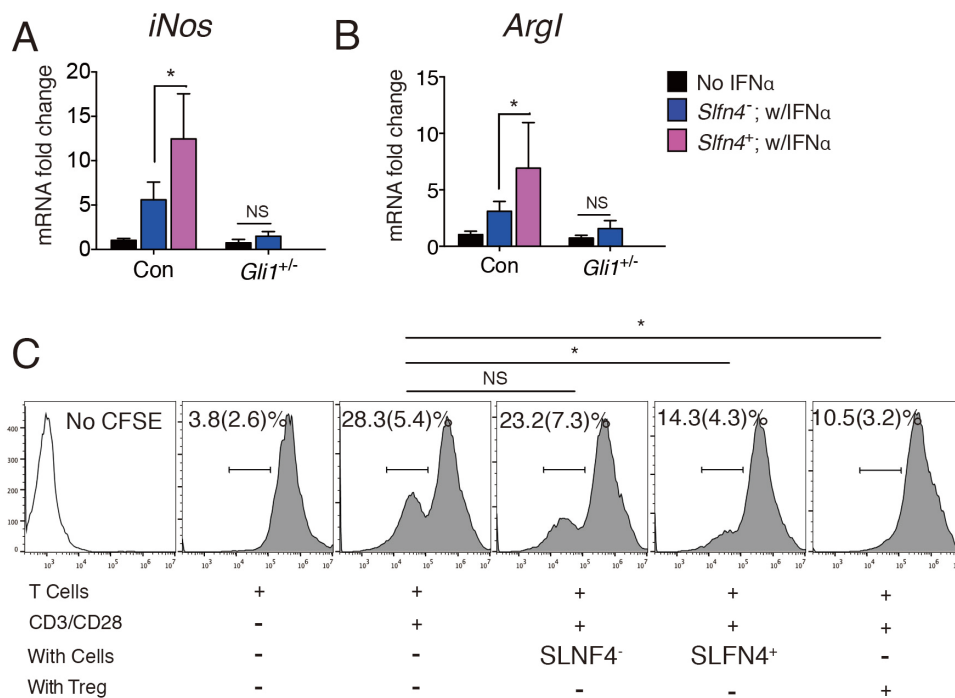

**Figure S9. Primary myeloid cells exhibit T cell suppressor function after IFN $\alpha$  treatment.** Primary myeloid cells from the WT and *Gli1*<sup>+/-</sup> mice were treated with rIFN $\alpha$  and then flow sorted for SLFN4-tdT<sup>+</sup> and SLFN4-tdT<sup>-</sup> cells. These two subpopulations were analyzed for **A**) *iNos* mRNA; or **B**) *Arg1* mRNA. One-way ANOVA followed by Tukey's multiple comparisons test on log-transformed values was performed. \*P<0.05. NS, not significant. **C**) The CFSE T suppression assay was performed using sorted cells by co-culturing with activated splenic T cells in a ratio of 1:10. The percentage of proliferating T cell is shown. For **A**)-**C**), shown are the median and interquartile range for N= 3 experiments performed in triplicate. \*P<0.05. NS, not significant.

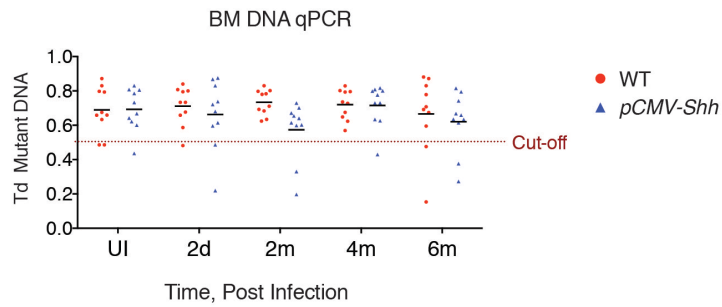

**Figure S10. Bone marrow transplantation efficiency.** DNA (1ng ) from the bone marrow of WT and *pCMV-Shh* chimeric mice containing bone marrow transplanted from *Slfn4-tdT* mice were used for qPCR analysis of tdTomato (tdT)DNA. The amount of *Slfn4-tdT*<sup>+</sup> donor mouse DNA was set to 1. The ratio of tdT DNA from chimeric mice 6 weeks post-BMT versus donor mice is shown. Each symbol represents one mouse. (–) indicates the mean. N= 10 mice per group. Samples with a ratio <0.5 were excluded from further analysis.
